# Supplementary material for: Mortality by Age, Gender, and Race and Ethnicity in People Experiencing Homelessness in Boston, Massachusetts
Source: PubMed Central journal article supplement (PMC10472188; doi:10.1001/jamanetworkopen.2023.31004), 2023-08-31
Supplement: jamanetwopen-e2331004-s001.pdf [file jamanetwopen-e2331004-s001.pdf]

## Supplementary Online Content

Fine DR, Dickins KA, Adams LD, et al. Mortality by age, gender, race, and ethnicity in people experiencing homelessness. *JAMA Netw Open.* 2023;6(8):e2331004.  
doi:10.1001/jamanetworkopen.2023.31004

**eTable 1.** *International Classification of Diseases (ICD)-10* Codes for Underlying Cause of Death

**eTable 2.** Mortality Rate Differences for the 5 Leading Causes of Death Among Women in the BHCHP Cohort Compared to Women in the Urban Northeast US Population, 2003-2018

**eTable 3.** Mortality Rate Differences for the 5 Leading Causes of Death Among Men in the BHCHP Cohort Compared to Men in the Urban Northeast US Population, 2003-2018

This supplementary material has been provided by the authors to give readers additional information about their work.

| <b>eTable1. International Classification of Diseases (ICD)-10 Codes for Underlying Cause of Death</b>        |                                                                                                   |                                                                                                               |
|--------------------------------------------------------------------------------------------------------------|---------------------------------------------------------------------------------------------------|---------------------------------------------------------------------------------------------------------------|
| <b>Underlying Cause of Death Categorization</b>                                                              |                                                                                                   | <b>ICD-10</b>                                                                                                 |
| Natural Causes                                                                                               |                                                                                                   |                                                                                                               |
| <i>Certain infectious and parasitic diseases (A00-B99)</i>                                                   | Sepsis                                                                                            | A40-A41                                                                                                       |
|                                                                                                              | Viral hepatitis                                                                                   | B15-B19                                                                                                       |
|                                                                                                              | HIV disease                                                                                       | B20-B24                                                                                                       |
|                                                                                                              | Other and unspecified infectious and parasitic diseases and their sequelae                        | A00, A05, A20-A36, A42-A44, A48-A49, A54-A79, A81-A82, A85.0-A85.1, A85.8, A86-B04, B06-B09, B25-B49, B55-B99 |
| <i>Neoplasms (C00-D48)</i>                                                                                   | Malignant neoplasms of lip, oral cavity, pharynx, larynx                                          | C00-C14, C32                                                                                                  |
|                                                                                                              | Malignant neoplasm of esophagus                                                                   | C15                                                                                                           |
|                                                                                                              | Malignant neoplasms of colon, rectum and anus                                                     | C18-C21                                                                                                       |
|                                                                                                              | Malignant neoplasms of liver and intrahepatic bile ducts                                          | C22, D37.6                                                                                                    |
|                                                                                                              | Malignant neoplasm of pancreas                                                                    | C25                                                                                                           |
|                                                                                                              | Malignant neoplasms of trachea, bronchus and lung                                                 | C33-C34, D38.1                                                                                                |
|                                                                                                              | Malignant neoplasm of breast, cervix uteri, corpus uteri and uterus, ovary                        | C50, C53-C56                                                                                                  |
|                                                                                                              | Malignant neoplasm of prostate                                                                    | C61                                                                                                           |
|                                                                                                              | Malignant neoplasms of lymphoid, hematopoietic and related tissue                                 | C81-C96                                                                                                       |
| All other and unspecified malignant neoplasms (e.g., bladder, brain, stomach, skin, kidney and renal pelvis) | C17, C23-C24, C26-C31, C37-C41, C44-C49, C51-C52, C57-C60, C62-C63, C66, C68-C69, C73-C80, C97    |                                                                                                               |
| <i>Diseases of the blood (D50-D89)</i>                                                                       | Diseases of the blood (anemias, hemorrhagic conditions, disorders involving the immune mechanism) | D50-D89                                                                                                       |
| <i>Endocrine, nutritional and metabolic diseases (E00-E90)</i>                                               | Diabetes mellitus                                                                                 | E10-E14                                                                                                       |
|                                                                                                              | All other endocrine, nutritional and metabolic diseases                                           | E00-E32, E34.0-E34.2, E34.4-E34.9, E65-E83, E85, E88                                                          |
| <i>Mental and behavioral disorders</i>                                                                       | Dementia and delirium                                                                             | F01-F05, G30                                                                                                  |
|                                                                                                              | Psychoactive substance use disorder                                                               | F10-F19                                                                                                       |

|                                                                                       |                                                                          |                                                                          |
|---------------------------------------------------------------------------------------|--------------------------------------------------------------------------|--------------------------------------------------------------------------|
| <i>(F00-F99)</i>                                                                      | Alcohol use disorder                                                     | F10                                                                      |
|                                                                                       | Other substance use disorders                                            | F11-F19                                                                  |
|                                                                                       | Other and unspecified mental and behavioral disorders                    | F06-F07, F09, F20-F48, F50-F99                                           |
| <i>Diseases of the nervous system (G00-G99)</i>                                       | Anoxic brain injury                                                      | G93.1                                                                    |
|                                                                                       | Other diseases of nervous system                                         | G04, G06-G11, G12.1-G12.9, G20-G72, G81-G92, G93.0, G93.2-G93.9, G95-G98 |
| <i>Diseases of the circulatory system (I00-I99)</i>                                   | Major cardiovascular diseases                                            | I00-I78                                                                  |
|                                                                                       | Cerebrovascular diseases                                                 | I60-I69                                                                  |
|                                                                                       | Other disorders of circulatory system                                    | I80-I99                                                                  |
| <i>Diseases of the respiratory system (J00-J99)</i>                                   | Influenza and pneumonia                                                  | J09-J18                                                                  |
|                                                                                       | Chronic lower respiratory diseases (COPD, chronic bronchitis and asthma) | J40-J47                                                                  |
|                                                                                       | Other and unspecified diseases of respiratory system                     | J00-J06, J30-J39, J67, J70-J98                                           |
| <i>Diseases of the digestive system (K00-K93)</i>                                     | Liver disease                                                            | K70-K77                                                                  |
|                                                                                       | All other and unspecified diseases of digestive system                   | K00-K14, K20-K31, K35-K38, K40-K46, K50-K52, K55-K67, K80-K87, K90-K93   |
| <i>Diseases of the skin and subcutaneous tissue (L00-L99)</i>                         | Diseases of the skin and subcutaneous tissue                             | L00-L99                                                                  |
| <i>Diseases of the musculoskeletal system and connective tissue (M00-M99)</i>         | Diseases of the musculoskeletal system and connective tissue             | M00-M99                                                                  |
| <i>Diseases of the genitourinary system (N00-N99)</i>                                 | Renal failure and other disorders of kidney                              | N17-N19, N25, N27                                                        |
|                                                                                       | Other and unspecified diseases of genitourinary system                   | N00-N15, N20-N23, N26, N28-N95                                           |
| <i>Pregnancy, childbirth and the puerperium (O00-O99)</i>                             | Pregnancy, childbirth and the puerperium                                 | O00-O99                                                                  |
| <i>Congenital malformations, deformations and chromosomal abnormalities (Q00-Q99)</i> | Congenital malformations, deformations and chromosomal abnormalities     | Q00-Q99                                                                  |

|                                                                                                                                                                       |                                                                                         |                         |
|-----------------------------------------------------------------------------------------------------------------------------------------------------------------------|-----------------------------------------------------------------------------------------|-------------------------|
| <i>Symptoms, signs and abnormal clinical and laboratory findings, not elsewhere classified (R00-R99)</i>                                                              | Symptoms, signs and abnormal clinical and laboratory findings, not elsewhere classified | R00-R99                 |
| External Causes                                                                                                                                                       |                                                                                         |                         |
| <i>Accidents (V01-X59, Y10-Y34)</i>                                                                                                                                   | Transport accidents                                                                     | V01-V99, Y85            |
|                                                                                                                                                                       | Non-transport accidents (non-poisoning)                                                 | W00-X59, Y86            |
|                                                                                                                                                                       | Drug overdose                                                                           | X40-X44, Y10-Y14        |
|                                                                                                                                                                       | Alcohol poisoning                                                                       | X45, Y15                |
| <i>Intentional self-harm (X60-X84)</i>                                                                                                                                | Suicide                                                                                 | U03, X60-X84, Y87.0     |
| <i>Assault (X85-Y09)</i>                                                                                                                                              | Homicide                                                                                | U01-U02, X85-Y09, Y87.1 |
| <i>Legal interventions and operations of war (Y35-Y36)</i>                                                                                                            | Legal interventions and operations of war                                               | Y35, Y89.0              |
| <i>Complications of medical and surgical care (Y40-Y84)</i>                                                                                                           | Complications of medical and surgical care                                              | Y40-Y84, Y88            |
| Adapted from: Heron M. Deaths: Leading causes for 2017. National Vital Statistics Reports; vol 68 no 6. Hyattsville, MD: National Center for Health Statistics. 2019. |                                                                                         |                         |

**eTable 2. Mortality Rate Differences for the 5 Leading Causes of Death Among Women in the BHCHP Cohort Compared to Women in the Urban Northeast US Population, 2003-2018**

|            | Entire BHCHP Cohort          |                          | Black, Non-Hispanic/Latinx |                          | Hispanic/Latinx |                          | White, Non-Hispanic/Latinx   |                          |
|------------|------------------------------|--------------------------|----------------------------|--------------------------|-----------------|--------------------------|------------------------------|--------------------------|
| Age strata | COD                          | Rate Difference (95% CI) | COD                        | Rate Difference (95% CI) | COD             | Rate Difference (95% CI) | COD                          | Rate Difference (95% CI) |
| 18-34      | Drug overdose                | 182.7 (151.1-214.2)      | Drug overdose              | 24.7 (1.4-48.0)          | Drug overdose   | 81.2 (39.4-122.9)        | Drug overdose                | 444.4 (357.2-531.6)      |
|            | PSUD                         | 34.9 (21.2-48.5)         | Diabetes                   | 12.6 (-3.8-29.1)         | PSUD            | 15.5 (-2.6-33.5)         | PSUD                         | 68.8 (34.8-102.8)        |
|            | Suicide                      | 17.1 (6.8-27.5)          | Homicide                   | 6.5 (-10.0-22.9)         | NA              | NA                       | Suicide                      | 39.5 (12.6-66.4)         |
|            | Ill-defined                  | 10.7 (2.7-18.7)          | CVD                        | 7.1 (-9.4-23.5)          | NA              | NA                       | Ill-defined                  | 33.1 (9.0-57.2)          |
|            | Other accidents <sup>a</sup> | 1.5 (-5.6-8.6)           | PSUD                       | 13.8 (-2.7-30.2)         | NA              | NA                       | Other accidents <sup>a</sup> | 9.5 (-9.5-28.5)          |
| 35-49      | Drug overdose                | 285.9 (244.1-327.7)      | Drug overdose              | 118.2 (66.2-170.2)       | Drug overdose   | 136.0 (74.1-198.0)       | Drug overdose                | 566.6 (469.4-663.7)      |
|            | CVD                          | 50.3 (29.6-71.1)         | CVD                        | 17.6 (-19.2-54.4)        | Liver disease   | 58.1 (17.5-98.6)         | PSUD                         | 131.2 (84.7-177.6)       |
|            | PSUD                         | 68.1 (47.7-88.4)         | Cancer                     | -16.8 (-50.6-17.1)       | CVD             | 40.4 (2.2-78.6)          | CVD                          | 87.5 (46.4-128.6)        |
|            | Cancer                       | 8.4 (-10.2-26.9)         | HIV                        | 14.6 (-16.0-45.2)        | PSUD            | 38.8 (5.7-71.9)          | Cancer                       | 27.5 (-7.4-62.3)         |
|            | Liver disease                | 38.5 (22.5-54.5)         | PSUD <sup>b</sup>          | 26.8 (1.8-51.7)          | HIV             | 21.9 (-8.4-52.1)         | Liver disease                | 56.4 (24.6-88.2)         |
| 50-64      | Cancer                       | 64.9 (13.6-116.2)        | Cancer                     | 60.4 (-38.0-158.8)       | CVD             | 66.2 (-34.4-166.8)       | Drug overdose                | 349.9 (259.5-440.4)      |
|            | Drug overdose                | 226.2 (178.9-273.6)      | CVD                        | 84.0 (-5.6-173.6)        | Drug overdose   | 100.7 (13.6-187.8)       | Cancer                       | 80.0 (-2.9-162.9)        |
|            | CVD                          | 125.5 (78.3-172.6)       | Drug overdose              | 119.9 (57.4-182.3)       | Liver disease   | 94.7 (7.6-181.8)         | Liver disease                | 213.0 (141.2-284.8)      |
|            | Liver disease                | 129.3 (92.5-166.0)       | HIV                        | 46.9 (1.5-92.2)          | Cancer          | -49.4 (-129.0-30.1)      | CVD                          | 132.8 (61.9-203.6)       |
|            | PSUD                         | 69.1 (42.9-95.3)         | Liver disease              | 48.7 (5.7-91.7)          | PSUD            | 69.3 (-1.8-140.4)        | Lower resp.                  | 85.4 (36.6-134.1)        |
| 65-79      | Cancer                       | -12.0 (-181.6-157.6)     | Cancer                     | 93.6 (-272.8-460.0)      | CVD             | -180.8 (-439.4-77.9)     | Drug overdose                | 88.4 (-14.1-191.0)       |

|  |                         |                     |                         |                       |    |    |                              |                      |
|--|-------------------------|---------------------|-------------------------|-----------------------|----|----|------------------------------|----------------------|
|  | CVD                     | -56.4 (-204.3-91.5) | CVD                     | -196.9 (-496.1-102.3) | NA | NA | CVD                          | 108.3 (-156.5-373.2) |
|  | Lower resp.             | 82.3 (-10.6-175.2)  | Cerebrovascular disease | 61.5 (-111.3-234.2)   | NA | NA | Lower resp.                  | 231.8 (26.7-437.0)   |
|  | Liver disease           | 75.2 (7.3-143.0)    | Sepsis                  | 74.5 (-75.0-224.1)    | NA | NA | Liver disease                | 127.3 (-5.1-259.7)   |
|  | Cerebrovascular disease | 2.3 (-61.2-65.8)    | NA                      | NA                    | NA | NA | Viral hepatitis <sup>c</sup> | 87.6 (-15.0-190.2)   |

<sup>a</sup> Other accidents ICD-10: W00-X59, Y16-Y36, Y86.

<sup>b</sup> Tie in number of deaths; cause of death with largest rate difference displayed in table. Other cause = lower respiratory disease, rate difference: 25.3 (0.3-50.3)

<sup>c</sup> Tie in number of deaths; cause of death with largest rate difference displayed in table. Other causes = Cancer, rate difference: 68.9 (-227.3-365.0); Diabetes, rate difference: 41.1 (-61.5-143.6); Other digestive diseases, rate difference: 48.6 (-54.0-151.2).

Abbreviation legend: "BHCHP"=Boston Health Care for the Homeless Program; "CVD"=cardiovascular disease; "HIV"= human immunodeficiency virus; "Lower resp."=chronic lower respiratory disease; "PSUD"=psychoactive substance use disorder; "NA"=not available

"PSUD" includes ICD-10 codes for mental and behavioral disorders due to psychoactive substance use (codes F10-19) and is generally intended for deaths related to a chronic pattern or sequelae of substance use rather than acute poisoning which is documented as "drug overdose" (codes X40-X44, Y10-Y14)

**eTable 3. Mortality Rate Differences for the 5 Leading Causes of Death Among Men in the BHCHP Cohort Compared to Men in the Urban Northeast US Population, 2003-2018**

|            | Entire BHCHP Cohort |                          | Black, Non-Hispanic/Latinx |                          | Hispanic/Latinx |                          | White, Non-Hispanic/Latinx |                          |
|------------|---------------------|--------------------------|----------------------------|--------------------------|-----------------|--------------------------|----------------------------|--------------------------|
| Age strata | COD                 | Rate Difference (95% CI) | COD                        | Rate Difference (95% CI) | COD             | Rate Difference (95% CI) | COD                        | Rate Difference (95% CI) |
| 18-34      | Drug overdose       | 466.4 (410.4, 522.4)     | Drug overdose              | 103.1 (45.9-160.3)       | Drug overdose   | 204.4 (124.4-284.3)      | Drug overdose              | 763.8 (656.7-871.0)      |
|            | Suicide             | 36.8 (19.1-54.5)         | Homicide                   | -22.5 (-73.8-28.7)       | PSUD            | 43.3 (6.9-79.6)          | Suicide                    | 68.6 (34.2-103.0)        |
|            | PSUD                | 47.3 (29.6-64.9)         | CVD                        | 23.0 (-10.0-56.0)        | Ill-defined     | 19.7 (-6.0-45.4)         | PSUD                       | 69.9 (37.9-101.9)        |
|            | Homicide            | 4.1 (-11.0-19.1)         | Suicide                    | 9.7 (-15.9-35.3)         | Homicide        | 1.0 (-24.7-26.7)         | Ill-defined                | 52.4 (23.9-80.8)         |
|            | Ill-defined         | 28.2 (13.9-42.5)         | Cancer                     | 13.8 (-11.8-39.4)        | NA              | NA                       | Transport accident         | 16.0 (-3.4-35.4)         |
| 35-49      | Drug overdose       | 398.1 (361.4-434.8)      | Drug overdose              | 108.8 (68.2-149.4)       | Drug overdose   | 280.4 (212.6-348.2)      | Drug overdose              | 656.3 (584.0-728.6)      |
|            | CVD                 | 59.0 (40.0-78.0)         | CVD                        | -4.8 (-38.7-29.1)        | CVD             | 24.8 (-5.7-55.4)         | CVD                        | 114.0 (79.0-148.9)       |
|            | PSUD                | 73.3 (57.4-89.2)         | Cancer                     | -8.2 (-32.2-15.7)        | PSUD            | 42.4 (14.7-70.1)         | PSUD                       | 140.6 (107.3-173.8)      |
|            | Cancer              | 26.3 (11.7-40.8)         | HIV                        | -10.3 (-32.1-11.5)       | HIV             | 23.8 (-3.0-50.5)         | Liver disease              | 93.3 (65.2-121.4)        |
|            | Liver disease       | 46.8 (33.3-60.2)         | Homicide                   | -6.6 (-25.9-12.7)        | Cancer          | 5.9 (-17.5-29.3)         | Cancer                     | 52.2 (25.9-78.4)         |
| 50-64      | CVD                 | 176.8 (139.3-214.3)      | Cancer                     | 22.6 (-39.7-84.9)        | Drug overdose   | 246.0 (162.3-329.7)      | CVD                        | 372.2 (307.8-436.7)      |
|            | Cancer              | 144.0 (107.9-180.1)      | CVD                        | -82.3 (-140.5--24.1)     | Cancer          | 56.7 (-22.1-135.5)       | Cancer                     | 247.0 (188.3-305.6)      |
|            | Drug overdose       | 288.6 (256.3-320.8)      | Drug overdose              | 130.5 (86.4-174.6)       | Liver disease   | 122.7 (57.6-187.8)       | Drug overdose              | 412.3 (357.5-467.1)      |
|            | PSUD                | 159.0 (135.2-182.7)      | PSUD                       | 68.9 (37.8-100.1)        | CVD             | -34.9 (-98.8-29.1)       | PSUD                       | 260.3 (217.2-303.4)      |

|       |               |                     |                            |                      |                         |                      |                                   |                     |
|-------|---------------|---------------------|----------------------------|----------------------|-------------------------|----------------------|-----------------------------------|---------------------|
|       | Liver disease | 129.6 (106.4-152.8) | Liver disease              | 43.3 (14.0-72.7)     | HIV                     | 50.8 (3.0-98.6)      | Liver disease                     | 201.2 (160.9-241.4) |
| 65-79 | Cancer        | 185.8 (56.0-315.6)  | Cancer                     | 288.6 (3.3-573.9)    | Cancer                  | -55.8 (-343.4-231.9) | CVD                               | 366.1 (174.5-557.7) |
|       | CVD           | 174.3 (44.5-304.1)  | CVD                        | -192.3 (-439.0-54.5) | CVD                     | -250.0 (-511.2-11.1) | Cancer                            | 166.3 (-12.8-345.5) |
|       | Lower resp.   | 103.8 (43.6-164.1)  | Diabetes                   | 79.7 (-42.7-202.0)   | Lower resp.             | 174.1 (-10.3-358.6)  | Lower resp.                       | 134.5 (43.3-225.6)  |
|       | Diabetes      | 59.1 (8.8-109.4)    | Lower resp.                | 12.8 (-79.0-104.5)   | PSUD                    | 128.2 (-11.2-267.6)  | Drug overdose                     | 149.9 (82.0-217.8)  |
|       | Drug overdose | 115.1 (71.0-159.2)  | Renal failure <sup>a</sup> | 22.9 (-58.0-103.8)   | Cerebrovascular disease | 53.3 (-86.1-192.8)   | Other resp. diseases <sup>b</sup> | 84.3 (19.9-148.8)   |

<sup>a</sup>Tie in number of deaths; cause of death with largest rate difference displayed in table. Other causes = Cerebrovascular disease, rate difference: -46.8 (-127.9-34.2)

<sup>b</sup>Other resp. diseases ICD-10: J00-J06, J20-J22, J30-J39, J60-J70, J80-J84, J85-J86, J90-J94, J96-J98.

Abbreviation legend: "BHCHP"=Boston Health Care for the Homeless Program; "CVD"=cardiovascular disease; "HIV"= human immunodeficiency virus; "Lower resp"=chronic lower respiratory disease; "PSUD"=psychoactive substance use disorder; "NA"=not available

"PSUD" includes ICD-10 codes for mental and behavioral disorders due to psychoactive substance use (codes F10-19) and is generally intended for deaths related to a chronic pattern or sequelae of substance use rather than acute poisoning which is documented as "drug overdose" (codes X40-X44, Y10-Y14)
