# Supplementary material for: Mortality by Age, Gender, and Race and Ethnicity in People Experiencing Homelessness in Boston, Massachusetts
Source: PubMed Central journal article supplement (PMC10472188; doi:10.1001/jamanetworkopen.2023.31004), 2023-08-31
Supplement: jamanetwopen-e2331004-s002.pdf [file jamanetwopen-e2331004-s002.pdf]

## Data Sharing Statement

Fine. Mortality by Age, Gender, and Race and Ethnicity in People Experiencing Homelessness in Boston, Massachusetts. *JAMA Netw Open*. Published August 31, 2023.

doi:10.1001/jamanetworkopen.2023.31004

### Data

**Data available:** Yes

**Data types:** Deidentified participant data

**How to access data:** The data that support the findings of this study are available from the corresponding author, KD ([Kirsten\\_Dickins@rush.edu](mailto:Kirsten_Dickins@rush.edu)), upon reasonable request.

**When available:** With publication

### Supporting Documents

**Document types:** None

### Additional Information

**Who can access the data:** Deidentified data will be made available to researchers whose proposed use of the data has been approved by the study team.

**Types of analyses:** Any type of analysis will be considered by the study team.

**Mechanisms of data availability:** The data will be made available without investigator support, after approval of a proposal, and with a signed data access agreement.
